# Supplementary material for: A Systematic Review of Gene Expression Studies in Critically Ill Patients with Sepsis and Community-Acquired Pneumonia
Source: MDPI journal article supplement (doi:10.3390/biomedicines11102755), 2023-10-11
Supplement: s1 [file s1]

**Supplementary Table S2: Quality assessment of included studies using the modified ‘Q-Genie’ assessment tool**

| Study                      | #1 | #2 | #3 | #4 | #5 | #6 | #7 | #8 | #9 | #10 | #11 | Total score |
|----------------------------|----|----|----|----|----|----|----|----|----|-----|-----|-------------|
| Severino et al., 2014 [24] | 6  | 4  | 5  | 6  | 4  | 4  | 5  | 5  | 4  | 5   | 6   | 56          |
| Scicluna et al., 2015 [27] | 6  | 4  | 5  | 5  | 4  | 4  | 5  | 4  | 4  | 5   | 6   | 52          |
| Esquerdo et al., 2017 [29] | 6  | 5  | 6  | 6  | 3  | 3  | 4  | 6  | 4  | 5   | 6   | 54          |
| Burnham et al., 2017 [28]  | 6  | 5  | 5  | 5  | 3  | 3  | 5  | 6  | 5  | 5   | 6   | 53          |
| Khan et al., 2021 [30]     | 6  | 4  | 5  | 5  | 3  | 4  | 5  | 4  | 5  | 5   | 5   | 52          |

#1: Rationale for study; #2: Selection and definition of outcome of interest; #3: Selection and comparability of comparison group; #4: Technical classification of the exposure; #5: Non-technical classification of the exposure; #6: Other sources of bias; #7: Sample size and power; #8: A priori planning of analyses; #9: Statistical methods and control for confounding; #10: Testing of assumptions and inferences for gene expression analyses; #11: Appropriateness of inferences drawn from results.
