# Supplementary material for: A Systematic Review of Gene Expression Studies in Critically Ill Patients with Sepsis and Community-Acquired Pneumonia
Source: MDPI journal article supplement (doi:10.3390/biomedicines11102755), 2023-10-11

**Supplementary Figure S2.** Enrichment using the Reactome collection from the MSigDB: Top 20 significant pathways dot plot of studies included with the cohorts using microarrays [24,27,28].

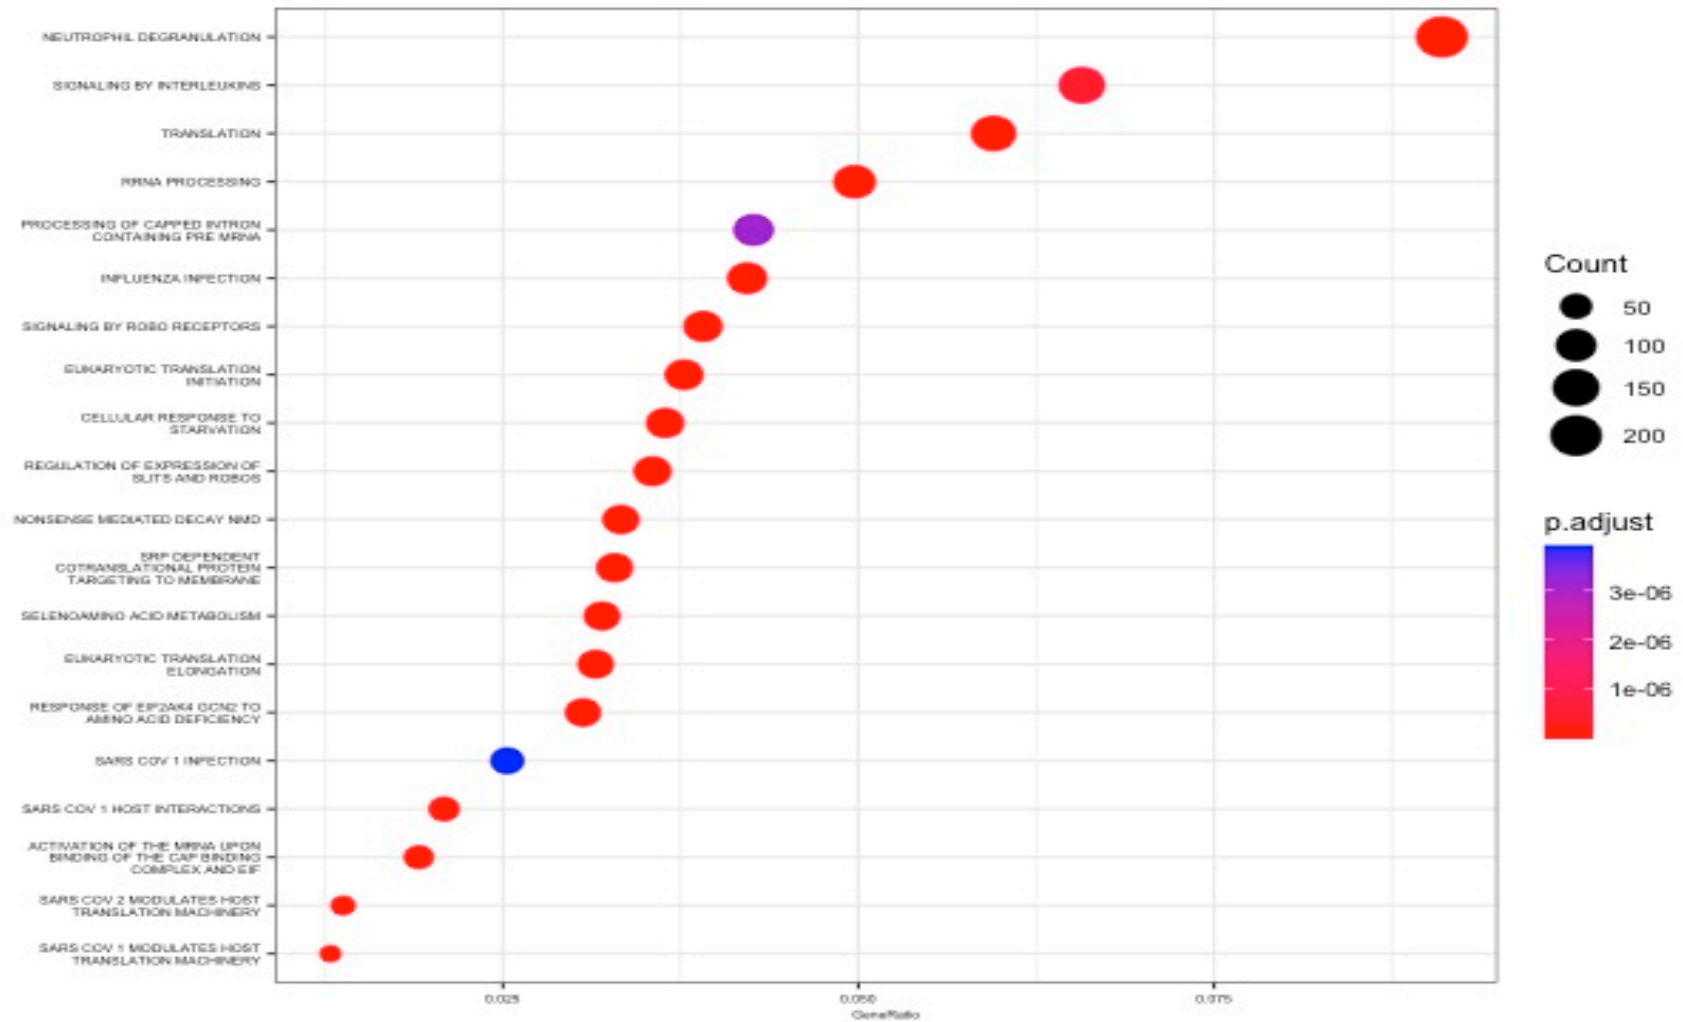

Supplement: s1 [file s1]
